# Supplementary material for: AIG1 affects in vitro and in vivo virulence in clinical isolates of Entamoeba histolytica
Source: PLoS Pathog. 2018 Mar 19;14(3):e1006882. doi: 10.1371/journal.ppat.1006882 (PMC5884625; doi:10.1371/journal.ppat.1006882)
Supplement: S2 Table — (XLSX) [file ppat.1006882.s002.xlsx]

## Sheet: Table S２
S2 Table. Predicted high copy number genes and missing genes in E. histolytica KU27 and KU50.
E. histolytica HM-1:IMSS contig accession number		Gene ID	Product	Length (amino acid)	KU27		KU50		Previous repot
					RPKM	Predicted gene copy number	RPKM	Predicted gene copy number
					(all RPKM median: 46.3, all RPKM average: 51.2, all RPKM SD: 26.6)	(each RPKM/RPKM median)	(all RPKM median: 51.6, all RPKM average: 57.4, all RPKM SD: 41.2)	(each RPKM/RPKM median)
Misssing in KU27
	NW_001915296.1	EHI_176590	AIG1 family protein	1076	0	0	16.0327	0.310632	Weedall et al., Genome Biol., 2012
	NW_001915268.1	EHI_089440	hypothetical protein	1262	0.910641	0.0196643	66.3386	1.2853	Weedall et al., Genome Biol., 2012
Misssing in KU50
	NW_001915556.1	EHI_039720	hypothetical protein	611	37.6698	0.81344	0.339561	0.00657895	Weedall et al., Genome Biol., 2012
	NW_001915258.1	EHI_025990	AIG1 family protein	896	27.6957	0.598059	0.589714	0.0114256	This study
Realtively high copy number in KU50 than KU27
	NW_001916300.1	EHI_087110	hypothetical protein, conserved	287	49.7861	1.07508	306.534	5.93907	This study
	NW_001915635.1	EHI_132530	heat shock protein70, hsp70A2, putative	141	161.212	3.4812	362.361	7.02071	This study
	NW_001915242.1	EHI_031740	RAS-related protein racG, putative	197	52.7524	1.13913	220.883	4.27958	This study
	NW_001915435.1	EHI_080100	cylicin-2, putative	380	62.4097	1.34767	228.802	4.43301	Weedall et al., Genome Biol., 2012
	NW_001915417.1	EHI_063440	hypothetical protein	69	433.402	9.35886	622.893	12.0685	This study
	NW_001915385.1	EHI_147220	Trucated hsp70 family protein	116	183.28	3.95773	336.987	6.52908	This study
	NW_001915203.1	EHI_123230	hypothetical protein, conserved	188	130.588	2.81991	273.916	5.30709	This study
	NW_001915172.1	EHI_072510	hypothetical protein	174	63.921	1.38031	199.247	3.86038	Weedall et al., Genome Biol., 2012
	NW_001915330.1	EHI_014810	hypothetical protein	240	218.574	4.71988	367.36	7.11756	This study
	NW_001915301.1	EHI_155060	chaperone clpB, putative	263	296.926	6.4118	453.668	8.78977	This study
	NW_001915589.1	EHI_034960	heat shock protein70, hsp70A2, putative	295	313.69	6.77381	471.852	9.14207	This study
	NW_001915203.1	EHI_123220	Ras family protein	185	107.319	2.31744	240.516	4.65998	This study
	NW_001914981.1	EHI_028920	heat shock protein, putative	866	330.17	7.12967	487.95	9.45398	This study
	NW_001914889.1	EHI_035700	beta-amylase, putative	437	178.23	3.84869	316.447	6.13112	This study
	NW_001915918.1	EHI_090840	chaperone clpB, putative	259	322.269	6.95905	474.817	9.19952	This study
	NW_001914875.1	EHI_126140	60S ribosomal protein L9, putative	197	98.0609	2.11752	223.841	4.33689	This study
	NW_001915172.1	EHI_072500	hypothetical protein	559	60.3215	1.30258	179.631	3.48032	Weedall et al., Genome Biol., 2012
	NW_001915144.1	EHI_113410	heat shock protein 70, putative	637	102.982	2.2238	223.614	4.33249	This study
	NW_001915071.1	EHI_185420	heat shock protein 70, putative	312	143.118	3.09048	264.064	5.11622	This study
	NW_001914943.1	EHI_161040	hypothetical protein	180	73.4215	1.58546	186.321	3.60995	This study
	NW_001914860.1	EHI_152160	hypothetical protein, conserved	147	104.134	2.24867	220.533	4.27281	This study
	NW_001914989.1	EHI_154190	hypothetical protein	170	117.63	2.54009	231.454	4.48439	This study
	NW_001915172.1	EHI_072460	hypothetical protein	354	102.067	2.20402	208.485	4.03938	Weedall et al., Genome Biol., 2012
	NW_001915098.1	EHI_147710	Ribosomal protein S30, putative	62	158.491	3.42244	269.585	5.22317	This study
	NW_001914904.1	EHI_174580	hypothetical protein	465	110.827	2.3932	215.73	4.17974	This study
	NW_001915143.1	EHI_101130	hypothetical protein	263	91.2625	1.97072	192.736	3.73423	This study
	NW_001915098.1	EHI_147720	serine/threonine-protein phosphatase, putative	304	119.832	2.58766	224.494	4.34954	This study
	NW_001914926.1	EHI_084710	hypothetical protein	251	99.53	2.14925	200.464	3.88397	This study
	NW_001915172.1	EHI_072520	hypothetical protein	108	61.0438	1.31818	156.45	3.03121	Weedall et al., Genome Biol., 2012
	NW_001915170.1	EHI_173620	interaptin, putative	1073	63.4253	1.3696	157.35	3.04864	Weedall et al., Genome Biol., 2012
	NW_001914875.1	EHI_125950	alcohol dehydrogenase, putative	383	96.0225	2.0735	191.412	3.70858	This study
	NW_001914898.1	EHI_118270	amoebapore C	101	95.3856	2.05975	188.61	3.65431	This study
	NW_001914894.1	EHI_093900	DEAD/DEAH box helicase, putative	391	103.56	2.23628	196.919	3.81529	This study
	NW_001915228.1	EHI_154570	hypothetical protein	113	70.7721	1.52825	159.808	3.09626	This study
	NW_001914910.1	EHI_005020	F-actin capping protein beta subunit, putative	276	64.4964	1.39273	152.59	2.95642	This study
	NW_001915216.1	EHI_172020	hypothetical protein	129	73.6614	1.59064	162.761	3.15348	Weedall et al., Genome Biol., 2012
	NW_001914860.1	EHI_152170	chitinase Jessie 3, putative	621	105.33	2.27449	196.188	3.80113	This study
	NW_001915233.1	EHI_127670	hypothetical protein	111	79.4144	1.71487	167.103	3.23761	This study
	NW_001915170.1	EHI_173640	hypothetical protein	208	64.8138	1.39959	150.683	2.91947	This study
	NW_001914860.1	EHI_153360	myb-like DNA-binding domain containing protein	154	87.9438	1.89905	175.715	3.40446	This study
	NW_001914938.1	EHI_158250	T-complex protein 1 gamma subunit, putative	551	97.4656	2.10467	185.577	3.59552	This study
	NW_001915023.1	EHI_184520	hypothetical protein	156	103.754	2.24046	192.489	3.72945	This study
	NW_001915185.1	EHI_058920	hypothetical protein	316	138.409	2.9888	230.239	4.46085	This study
	NW_001914868.1	EHI_023110	NADP-dependent alcohol dehydrogenase	366	178.795	3.86088	273.289	5.29495	This study
	NW_001914868.1	EHI_023220	hypothetical protein	64	176.027	3.80112	269.525	5.22201	This study
	NW_001915119.1	EHI_187780	hypothetical protein	132	120.939	2.61156	207.101	4.01256	This study
	NW_001915174.1	EHI_129490	CXXC-rich protein	461	107.269	2.31636	191.632	3.71284	This study
	NW_001915216.1	EHI_172010	hypothetical protein	550	67.6153	1.46008	147.421	2.85626	Weedall et al., Genome Biol., 2012
	NW_001914865.1	EHI_068490	hypothetical protein	313	141.685	3.05954	229.651	4.44946	This study
	NW_001915176.1	EHI_091730	hypothetical protein	190	54.2843	1.17221	131.683	2.55134	This study
	NW_001915057.1	EHI_119620	DEAD/DEAH box helicase, putative	694	96.0687	2.0745	178.064	3.44997	This study
	NW_001915219.1	EHI_005657	hypothetical protein	866	119.352	2.57729	202.872	3.93062	Weedall et al., Genome Biol., 2012
	NW_001915083.1	EHI_114330	hypothetical protein	225	130.168	2.81085	214.331	4.15264	This study
	NW_001915168.1	EHI_067260	hypothetical protein	399	52.2036	1.12728	127.332	2.46703	This study
	NW_001914973.1	EHI_078540	hypothetical protein	122	69.2647	1.4957	146.323	2.83499	Weedall et al., Genome Biol., 2012
	NW_001914871.1	EHI_182670	enhancer binding protein-2, putative	229	108.68	2.34683	190.069	3.68257	This study
	NW_001915228.1	EHI_154580	hypothetical protein	69	83.9785	1.81343	162.291	3.14436	This study
	NW_001915394.1	EHI_135580	hypothetical protein	110	54.6466	1.18004	129.214	2.50351	Weedall et al., Genome Biol., 2012
	NW_001915329.1	EHI_101390	endonuclease V, putative	239	67.2371	1.45191	142.414	2.75926	This study
	NW_001914860.1	EHI_153770	phosphatidylinositol-4-phosphate 5-kinase, putative	646	46.5876	1.00601	119.289	2.3112	This study
	NW_001914868.1	EHI_023230	histone H4	118	112.616	2.43182	192.835	3.73616	This study
	NW_001914867.1	EHI_049690	galactose-specific adhesin light subunit, putative	288	89.1753	1.92565	166.606	3.22798	This study
	NW_001915097.1	EHI_038310	60S ribosome subunit biogenesis protein NIP7, putative, pseudogene	178	77.8511	1.68111	153.958	2.98292	This study
	NW_001914910.1	EHI_005140	hypothetical protein	164	57.5199	1.24208	131.289	2.54371	This study
	NW_001914906.1	EHI_194570	26S protease regulatory subunit, putative	391	77.98	1.6839	153.738	2.97865	This study
	NW_001915329.1	EHI_101430	hypothetical protein, conserved	237	72.5236	1.56607	147.616	2.86005	This study
	NW_001915135.1	EHI_059340	hypothetical protein	176	62.1398	1.34184	135.801	2.63113	This study
	NW_001915041.1	EHI_166490	alcohol dehydrogenase, putative	419	141.79	3.0618	224.259	4.34499	This study
	NW_001914955.1	EHI_017720	zinc finger protein, putative	140	56.8575	1.22778	129.385	2.50682	This study
	NW_001914860.1	EHI_153800	hypothetical protein	203	117.186	2.5305	196.204	3.80144	This study
	NW_001915187.1	EHI_119790	hypothetical protein	109	59.4045	1.28278	130.927	2.53669	Weedall et al., Genome Biol., 2012
	NW_001914910.1	EHI_004750	signal recognition particle protein SRP54, putative	487	71.2465	1.53849	144.102	2.79197	This study
	NW_001914868.1	EHI_023500	calmodulin, putative	153	51.8918	1.12055	122.389	2.37126	This study
	NW_001914875.1	EHI_126130	hypothetical protein	165	92.8381	2.00474	167.527	3.24581	This study
	NW_001914874.1	EHI_186920	3-oxoacyl-(acyl-carrier protein) reductase, putative	265	66.6831	1.43995	138.091	2.6755	This study
	NW_001915046.1	EHI_170300	hypothetical protein	168	52.9826	1.1441	122.704	2.37738	This study
	NW_001915945.1	EHI_015750	chitinase Jessie3, putative	214	49.0964	1.06019	118.331	2.29264	This study
	NW_001914860.1	EHI_153790	hypothetical protein	412	78.6663	1.69872	151.179	2.92908	This study
	NW_001914910.1	EHI_005060	Fe-hydrogenase, putative	504	51.3704	1.10929	120.746	2.33944	This study
	NW_001915627.1	EHI_082800	hypothetical protein	447	58.7173	1.26794	128.827	2.49601	This study
	NW_001914945.1	EHI_188770	hypothetical protein	146	103.51	2.23518	178.638	3.46109	This study
	NW_001914910.1	EHI_004940	hypothetical protein	265	88.3984	1.90887	161.67	3.13234	This study
	NW_001914877.1	EHI_155410	40S ribosomal protein S11, putative	156	119.708	2.58497	196.46	3.80639	This study
	NW_001914946.1	EHI_048590	calcineurin catalytic subunit A, putative	592	91.6298	1.97865	164.957	3.19602	This study
	NW_001915237.1	EHI_085840	hypothetical protein	165	65.539	1.41525	135.847	2.63203	This study
	NW_001914875.1	EHI_126150	pre-mRNA-splicing factor cwc2, putative	355	77.7529	1.67899	149.366	2.89396	This study
	NW_001914871.1	EHI_183120	centromeric protein E, putative	1056	93.17	2.01191	166.413	3.22423	This study
	NW_001915088.1	EHI_181390	hypothetical protein, conserved	203	74.8802	1.61696	145.949	2.82775	This study
	NW_001914910.1	EHI_004960	bystin, putative	431	72.9092	1.5744	143.497	2.78024	This study
	NW_001914929.1	EHI_164190	DNA polymerase, putative	1278	113.352	2.44772	188.466	3.65151	This study
	NW_001914860.1	EHI_152990	actin-binding protein, cofilin/tropomyosin family	139	51.5433	1.11302	119.424	2.31382	This study
	NW_001915172.1	EHI_072490	hypothetical protein	1105	79.6251	1.71942	150.54	2.91669	Weedall et al., Genome Biol., 2012
	NW_001914868.1	EHI_023240	dihydrouridine synthase (Dus) family protein	366	103.455	2.234	176.997	3.4293	This study
	NW_001914981.1	EHI_028990	hypothetical protein	119	58.5694	1.26474	126.963	2.45989	This study
	NW_001914910.1	EHI_004810	hypothetical protein, conserved	241	65.4457	1.41323	134.429	2.60455	This study
	NW_001914868.1	EHI_023190	exonuclease, putative	486	81.2944	1.75547	151.963	2.94426	This study
	NW_001914961.1	EHI_163670	ribosomal protein L18a, putative	173	68.9398	1.48868	137.6	2.66598	This study
	NW_001915109.1	EHI_075690	hypothetical protein	218	95.9714	2.0724	167.583	3.2469	This study
	NW_001915098.1	EHI_147700	ubiquitin-conjugating enzyme family protein	164	123.014	2.65637	197.371	3.82404	This study
	NW_001914867.1	EHI_049720	hypothetical protein	367	96.609	2.08617	167.871	3.25248	This study
	NW_001914873.1	EHI_103860	hypothetical protein	248	103.672	2.23868	175.692	3.40402	This study
	NW_001915088.1	EHI_181510	RecF/RecN/SMC domain containing protein	187	128.111	2.76641	202.82	3.92962	This study
	NW_001914946.1	EHI_048700	ubiquitin-conjugating enzyme family protein	165	69.3882	1.49837	137.137	2.65702	This study
	NW_001914926.1	EHI_084700	RNase HI large subunit, putative	270	55.2997	1.19414	121.316	2.35049	This study
	NW_001914989.1	EHI_154240	Ras family GTPase	197	64.1548	1.38536	131.003	2.53817	This study
	NW_001914961.1	EHI_163620	hypothetical protein	125	68.3593	1.47615	135.392	2.62321	This study
	NW_001914923.1	EHI_030760	60S ribosomal protein L24, putative	163	74.3906	1.60639	142.103	2.75323	This study
	NW_001914888.1	EHI_087720	hypothetical protein	179	122.603	2.64748	195.64	3.7905	This study
	NW_001914870.1	EHI_092680	hypothetical protein, conserved	400	92.5678	1.99891	162.081	3.1403	This study
	NW_001915111.1	EHI_193080	60S ribosomal protein L9, putative	197	67.1668	1.4504	133.738	2.59116	This study
	NW_001914872.1	EHI_197160	sulfate adenylyltransferase, putative	423	150.78	3.25594	226.792	4.39407	This study
	NW_001915097.1	EHI_038300	hypothetical protein	244	62.3492	1.34637	128.054	2.48103	This study
	NW_001914985.1	EHI_128150	hypothetical protein	121	99.5507	2.14969	169.261	3.27941	This study
	NW_001914945.1	EHI_188790	hypothetical protein, conserved	229	122.274	2.64038	194.587	3.7701	This study
	NW_001914871.1	EHI_182730	hypothetical protein	163	134.599	2.90652	208.272	4.03524	This study
	NW_001914986.1	EHI_078300	ribosomal protein S24, putative	140	83.9267	1.81231	151.359	2.93256	This study
	NW_001914867.1	EHI_049880	hypothetical protein	100	72.7958	1.57195	138.852	2.69025	This study
	NW_001915041.1	EHI_166410	myb-like DNA-binding domain containing protein	96	136.243	2.94203	209.411	4.05732	This study
	NW_001914935.1	EHI_173950	transporter, major facilitator family	528	46.9139	1.01306	109.768	2.12675	This study
	NW_001914871.1	EHI_182520	DNAJ homolog subfamily A member 1, putative	346	109.748	2.36988	179.773	3.48307	This study
	NW_001914868.1	EHI_023440	hypothetical protein	198	54.3282	1.17316	117.94	2.28507	This study
	NW_001914869.1	EHI_178570	chaperonin 1 60 kDa	536	104.805	2.26315	174.096	3.3731	This study
	NW_001915032.1	EHI_192040	hypothetical protein	167	129.771	2.80227	201.701	3.90794	This study
	NW_001914985.1	EHI_128210	hypothetical protein	301	68.7771	1.48517	133.578	2.58806	This study
	NW_001914949.1	EHI_059830	hypothetical protein	904	61.7079	1.33252	125.271	2.42711	Weedall et al., Genome Biol., 2012
	NW_001914994.1	EHI_111040	DEAD/DEAH box helicase, putative	432	167.44	3.61569	243.108	4.71019	This study
	NW_001915100.1	EHI_121470	DNA methyltransferase, putative	210	86.4069	1.86587	152.777	2.96003	This study
	NW_001914974.1	EHI_042170	aminoacyl-histidine dipeptidase, putative	516	100.373	2.16744	168.334	3.26146	This study
	NW_001915037.1	EHI_055670	60S ribosomal protein L3, putative	402	96.9707	2.09398	164.542	3.18799	Weedall et al., Genome Biol., 2012
	NW_001915148.1	EHI_123850	surface antigen ariel1, putative	286	101.938	2.20124	170.049	3.29468	This study
	NW_001914910.1	EHI_004770	hypothetical protein, conserved	233	55.4581	1.19756	118.045	2.2871	This study
	NW_001914860.1	EHI_153330	40S ribosomal protein S12, putative	136	65.6068	1.41671	129.302	2.5052	This study
	NW_001914908.1	EHI_134840	ADP-ribosylation factor, putative	162	46.361	1.00112	107.788	2.08838	This study
	NW_001914981.1	EHI_029020	Rho family GTPase	215	61.734	1.33308	124.898	2.41988	This study
	NW_001915018.1	EHI_147570	Rho GDP exchange inhibitor, putative	175	106.93	2.30904	175.144	3.39339	This study
	NW_001914867.1	EHI_049770	mitotic chromosome and X-chromosome-associated protein, putative	1151	46.9611	1.01408	108.306	2.09842	This study
	NW_001914888.1	EHI_087710	hypothetical protein, conserved	518	88.3637	1.90812	154.326	2.99006	This study
	NW_001915187.1	EHI_119780	hypothetical protein	101	67.9059	1.46636	131.379	2.54545	Weedall et al., Genome Biol., 2012
	NW_001914940.1	EHI_054760	peptidyl prolyl cis-trans isomerase, putative	351	108.189	2.33622	176.092	3.41176	This study
	NW_001914879.1	EHI_069550	splicing factor3B subunit 2, putative	207	69.4864	1.50049	132.939	2.57568	This study
	NW_001914863.1	EHI_011870	proteasome subunit beta type 5 precursor, putative	252	119.206	2.57414	188.347	3.6492	This study
	NW_001915083.1	EHI_114320	phospholipase B, putative	550	95.9416	2.07176	162.187	3.14236	This study
	NW_001914910.1	EHI_004840	bacterial transferase hexapeptide family protein	177	55.9036	1.20718	117.526	2.27705	This study
	NW_001914961.1	EHI_163530	hypothetical protein	170	119.97	2.59063	188.919	3.66029	This study
	NW_001914871.1	EHI_182850	ribosomal protein L23A, putative	121	150.768	3.25568	223.193	4.32434	This study
	NW_001914877.1	EHI_155270	hypothetical protein	82	96.6918	2.08796	162.895	3.15608	This study
	NW_001914874.1	EHI_186820	protein kinase domain containing protein	419	70.6717	1.52608	133.893	2.59416	This study
	NW_001915221.1	EHI_001410	hypothetical protein, conserved	486	64.3952	1.39055	126.735	2.45547	This study
	NW_001914989.1	EHI_154210	hypothetical protein	128	54.2874	1.17228	115.06	2.22928	This study
	NW_001914873.1	EHI_103520	hypothetical protein	262	74.3113	1.60467	137.032	2.65498	This study
	NW_001915172.1	EHI_072480	hypothetical protein	577	68.1122	1.47081	130.119	2.52104	Weedall et al., Genome Biol., 2012
	NW_001914874.1	EHI_187150	60S ribosomal protein L13, putative	291	75.5673	1.6318	138.303	2.67961	This study
	NW_001914961.1	EHI_163740	WD repeat protein	605	62.4627	1.34882	123.639	2.39549	This study
	NW_001914868.1	EHI_023430	glycosyl hydrolase, family 31 protein	871	50.3455	1.08716	110.116	2.13349	This study
	NW_001915064.1	EHI_098800	hypothetical protein, conserved	365	91.7132	1.98045	156.125	3.0249	This study
	NW_001914860.1	EHI_151630	RING finger protein, putative	94	68.841	1.48655	130.5	2.52843	This study
	NW_001914867.1	EHI_049920	tubulin family protein	459	68.8787	1.48736	130.286	2.52427	This study
	NW_001915631.1	EHI_112490	serine-rich 25 kDa antigen protein, putative	235	72.1274	1.55752	133.844	2.59322	This study
	NW_001914945.1	EHI_188780	hypothetical protein	164	130.995	2.82869	199.415	3.86364	This study
	NW_001914961.1	EHI_163760	hypothetical protein	186	60.5895	1.30837	120.926	2.34293	This study
	NW_001915691.1	EHI_116360	serine-rich protein	233	129.213	2.79022	197.342	3.82349	This study
	NW_001914899.1	EHI_009260	hypothetical protein, conserved	357	102.83	2.2205	167.934	3.2537	This study
	NW_001915046.1	EHI_170340	60S ribosomal protein L40, putative	56	73.6867	1.59119	135.447	2.62428	This study
	NW_001914860.1	EHI_152350	casein kinase II regulatory subunit family protein	238	55.2523	1.19312	114.88	2.22578	This study
	NW_001914888.1	EHI_087390	Rho family GTPase	189	99.3201	2.14471	163.896	3.17546	This study
	NW_001914981.1	EHI_029050	long-chain-fatty-acid--CoA ligase, putative	613	52.0192	1.1233	110.808	2.14689	This study
	NW_001914910.1	EHI_004790	protein kinase, putative	347	59.257	1.27959	118.852	2.30275	This study
	NW_001914860.1	EHI_151810	translation initiation factor eIF-5A, putative	155	51.4996	1.11208	110.162	2.13439	Weedall et al., Genome Biol., 2012
	NW_001914860.1	EHI_153440	diacylglycerol kinase, putative	567	49.0174	1.05848	107.387	2.08061	This study
	NW_001914871.1	EHI_182590	Ribosomal protein S30, putative	64	142.473	3.07656	211.493	4.09764	This study
	NW_001914879.1	EHI_069560	hypothetical protein	207	66.4361	1.43462	126.642	2.45368	This study
	NW_001914875.1	EHI_126190	actin, putative	376	92.314	1.99342	155.478	3.01237	Weedall et al., Genome Biol., 2012
	NW_001914946.1	EHI_048560	hypothetical protein	175	63.6546	1.37455	123.513	2.39305	This study
	NW_001914863.1	EHI_011830	hypothetical protein	157	100.024	2.15991	163.85	3.17457	This study
	NW_001914875.1	EHI_125970	hypothetical protein	143	64.6658	1.39639	124.241	2.40715	This study
	NW_001914975.1	EHI_139020	hypothetical protein	176	146.806	3.17012	215.709	4.17934	This study
	NW_001914955.1	EHI_017660	hypothetical protein	103	57.5889	1.24357	116.197	2.25131	This study
	NW_001914908.1	EHI_134600	hypothetical protein	135	56.0662	1.21069	114.463	2.2177	This study
	NW_001915028.1	EHI_056420	protein phosphatase, putative	335	52.745	1.13897	110.701	2.14483	This study
	NW_001915037.1	EHI_055630	ATP-binding cassette, sub-family C, putative	288	55.2444	1.19295	113.33	2.19575	This study
	NW_001914961.1	EHI_163630	phosphofructokinase, putative	439	62.6187	1.35219	121.481	2.35368	This study
Realtively high copy number in KU27 than KU50
	NW_001914886.1	EHI_073500	hypothetical protein	102	95.1036	2.05366	53.8054	1.04247	This study
	NW_001914871.1	EHI_182800	hypothetical protein	64	98.4336	2.12557	56.3851	1.09245	This study
	NW_001914999.1	EHI_070690	hypothetical protein	476	109.706	2.36899	67.9907	1.31731	This study
	NW_001914863.1	EHI_012400	hypothetical protein, conserved	167	114.501	2.47253	72.9301	1.41301	This study
	NW_001914944.1	EHI_076810	serine/threonine- protein phosphatase PP-Z, putative	441	114.089	2.46363	72.0771	1.39649	This study
	NW_001914955.1	EHI_017570	hypothetical protein	218	102.624	2.21605	59.2924	1.14878	This study
	NW_001915230.1	EHI_022010	hypothetical protein	128	141.134	3.04764	100.025	1.93797	This study
	NW_001915052.1	EHI_079220	inositol polyphosphate 5-phosphatase, putative	675	102.726	2.21826	56.4335	1.09339	This study
	NW_001914934.1	EHI_168830	hypothetical protein	168	110.706	2.39059	65.0869	1.26105	This study
	NW_001915402.1	EHI_179600	cysteine protease, putative	431	137.141	2.96142	92.0689	1.78383	This study
	NW_001914975.1	EHI_139040	hypothetical protein, conserved	492	111.844	2.41516	63.6682	1.23356	This study
	NW_001914975.1	EHI_138770	60S acidic ribosomal protein P2, putative	105	191.851	4.14282	151.254	2.93053	This study
	NW_001916148.1	EHI_176040	hypothetical protein	121	122.191	2.6386	71.8706	1.39248	This study
	NW_001914892.1	EHI_166690	hypothetical protein	324	105.38	2.27558	52.1417	1.01024	This study
	NW_001915063.1	EHI_020890	hypothetical protein	165	161.41	3.48547	112.327	2.17633	This study
	NW_001914944.1	EHI_077240	transcription initiation factor TFIID family protein	216	116.97	2.52585	61.8379	1.1981	This study
	NW_001915543.1	EHI_074930	hypothetical protein	218	109.47	2.3639	52.7651	1.02232	This study
	NW_001915107.1	EHI_124830	hypothetical protein, conserved	298	146.563	3.16487	93.3576	1.80879	This study
	NW_001914975.1	EHI_139050	hypothetical protein	153	137.973	2.97937	83.6233	1.62019	This study
	NW_001915147.1	EHI_131470	ribosome biogenesis protein Nop10, putative	59	224.774	4.85376	180.103	3.48947	This study
	NW_001915060.1	EHI_002250	hypothetical protein	395	111.765	2.41346	53.6225	1.03893	This study
	NW_001914871.1	EHI_182840	hypothetical protein	93	128.246	2.76933	69.9948	1.35614	This study
	NW_001914929.1	EHI_164170	hypothetical protein	88	219.758	4.74545	167.915	3.25334	This study
	NW_001915127.1	EHI_160450	hypothetical protein	711	289.928	6.26069	243.233	4.71262	This study
	NW_001914887.1	EHI_013900	hypothetical protein	211	257.475	5.55991	205.227	3.97625	This study
	NW_001915576.1	EHI_121160	cysteine protease, putative	421	182.827	3.94796	115.381	2.23549	This study
	NW_001914944.1	EHI_076830	CBF/NF-Y transcription factor domain protein	212	134.193	2.89776	58.8635	1.14047	This study
	NW_001915615.1	EHI_029930	hypothetical protein	135	152.412	3.29118	77.8829	1.50897	Weedall et al., Genome Biol., 2012
	NW_001915040.1	EHI_109010	hypothetical protein	334	217.14	4.68891	149.922	2.90473	This study
	NW_001915234.1	EHI_132860	DNA polymerase, putative	1090	136.399	2.94539	57.3453	1.11106	Weedall et al., Genome Biol., 2012
	NW_001915106.1	EHI_034580	hypothetical protein	586	146.502	3.16355	66.76	1.29347	This study
	NW_001915182.1	EHI_175700	hypothetical protein	361	158.553	3.42379	75.7416	1.46749	This study
	NW_001914934.1	EHI_168710	hypothetical protein	229	143.017	3.08831	54.3211	1.05247	This study
	NW_001915093.1	EHI_113890	serine-rich protein C30B4.01c precursor, putative	175	178.088	3.84562	65.0841	1.261	Weedall et al., Genome Biol., 2012
	NW_001915444.1	EHI_019290	hypothetical protein	405	206.001	4.44838	82.8421	1.60506	This study
	NW_001914957.1	EHI_109700	protein kinase domain containing protein	950	311.721	6.73128	91.1355	1.76574	This study
	NW_001915048.1	EHI_109220	proteoglycan-4 precursor, putative	302	313.536	6.77049	52.1242	1.0099	This study
